# Supplementary material for: Identification of a novel locus associated with skin colour in African-admixed populations
Source: PubMed Central journal article supplement (PMC5353593; doi:10.1038/srep44548), 2017-03-16
Supplement: srep44548-s1.pdf [file srep44548-s1.pdf]

# SUPPLEMENTARY MATERIAL

## Identification of a novel locus associated with skin colour in African-admixed populations

Natalia Hernandez-Pacheco<sup>1,2</sup>, Carlos Flores<sup>1,3</sup>, Santos Alonso<sup>4</sup>, Celeste Eng<sup>5</sup>, Angel C.Y. Mak<sup>5</sup>, Scott Hunstman<sup>5</sup>, Donglei Hu<sup>5</sup>, Marquitta J. White<sup>5</sup>, Sam S. Oh<sup>5</sup>, Kelley Meade<sup>6</sup>, Harold J. Farber<sup>7</sup>, Pedro C. Avila<sup>8</sup>, Denise Serebrisky<sup>9</sup>, Shannon M. Thyne<sup>10</sup>, Emerita Brigino-Buenaventura<sup>11</sup>, William Rodriguez-Cintron<sup>12</sup>, Saunak Sen<sup>13</sup>, Rajesh Kumar<sup>14</sup>, Michael Lenoir<sup>15</sup>, Jose R. Rodriguez-Santana<sup>16</sup>, Esteban G. Burchard<sup>5,17</sup>, Maria Pino-Yanes<sup>1,3</sup>

<sup>1</sup>Research Unit, Hospital Universitario N.S. de Candelaria, Universidad de La Laguna, Santa Cruz de Tenerife, Spain.

<sup>2</sup>Applied Genomics Group (G2A), Section of Genetics, Department of Biochemistry, Microbiology, Cell Biology and Genetics, Universidad de La Laguna, San Cristobal de La Laguna, Tenerife, Spain.

<sup>3</sup>CIBER de Enfermedades Respiratorias, Instituto de Salud Carlos III, Madrid, Spain.

<sup>4</sup>Department of Genetics, Physical Anthropology and Animal Physiology, University of the Basque Country UPV/EHU, Leioa, Bizkaia, Spain.

<sup>5</sup>Department of Medicine, University of California, San Francisco, CA, United States.

<sup>6</sup>Children's Hospital and Research Center Oakland, Oakland, CA, USA.

<sup>7</sup>Department of Pediatrics, Section of Pulmonology, Baylor College of Medicine and Texas Children's Hospital, Houston, TX, USA.

<sup>8</sup>Allergy & ENT Associates, Woodlands, TX, USA.

<sup>9</sup>Pediatric Pulmonary Division, Jacobi Medical Center, Bronx, NY, USA.

<sup>10</sup>Department of Pediatrics, University of California San Francisco, San Francisco General Hospital, San Francisco, CA, USA.

<sup>11</sup>Department of Allergy and Immunology, Kaiser Permanente-Vallejo Medical Center, Vallejo, CA.

<sup>12</sup>Veterans Caribbean Health Care System, San Juan, Puerto Rico.

<sup>13</sup>Division of Biostatistics, Department of Preventive Medicine, UTHSC, Memphis, TN, USA.

<sup>14</sup>Children's Memorial Hospital and the Feinberg School of Medicine, Northwestern University, Chicago, IL, USA.

<sup>15</sup>Bay Area Pediatrics, Oakland, CA, USA.

<sup>16</sup>Centro de Neumología Pediátrica, San Juan, Puerto Rico.

<sup>17</sup>Department of Bioengineering and Therapeutic Sciences, University of California, San Francisco, CA, United States.

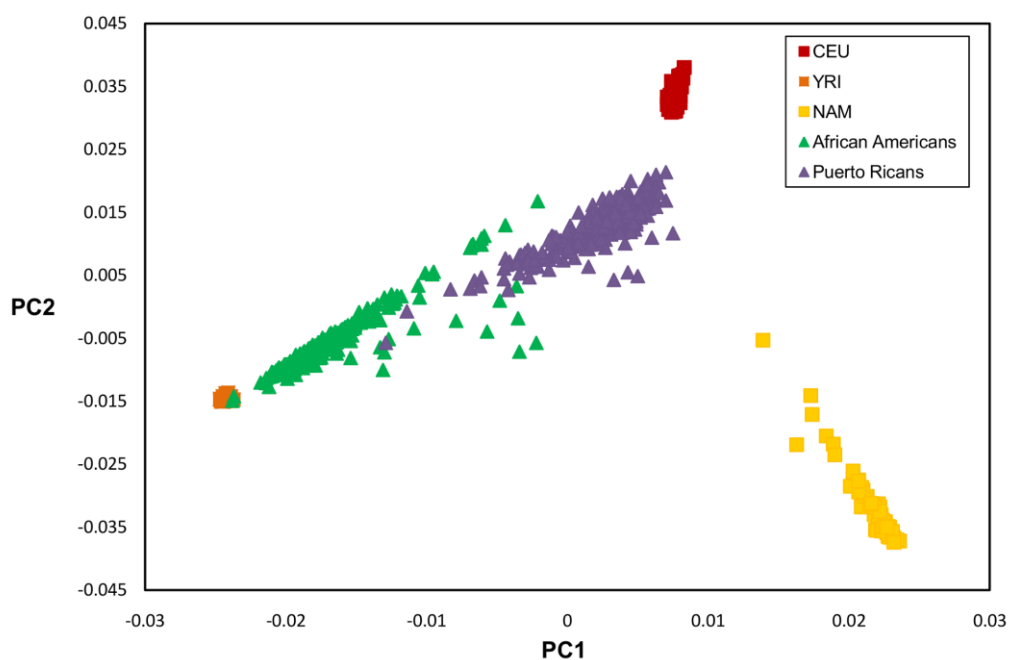

**Supplementary Figure S1. PCA plot showing the ancestral composition of the individuals included in the current study, represented by the two first principal components (PC1 and PC2).** Reference populations of European (CEU), African (YRI) and Native American (NAM) descent are shown along with the individuals included in discovery (Hispanics/Latinos from Puerto Rico) and replication (African Americans) stages.

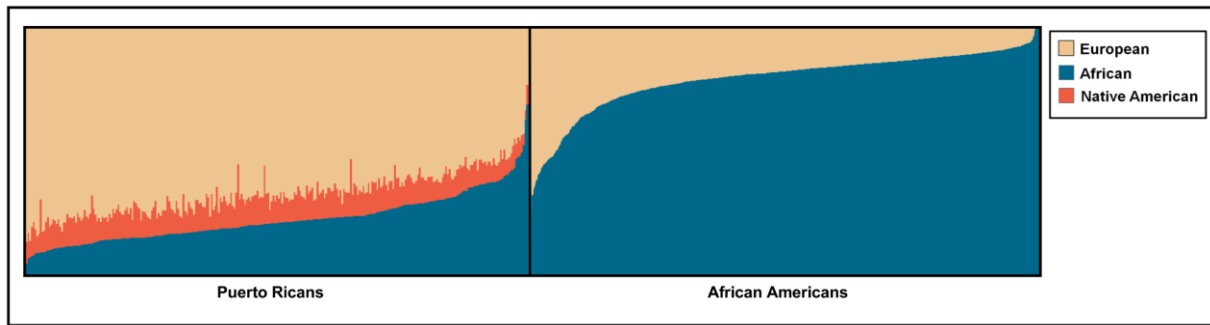

**Supplementary Figure S2. Distribution of admixture proportions among Hispanics/Latinos from Puerto Rico and African American individuals.** Each subject is represented by one vertical bar and colours show ancestry components. The individuals have been sorted by their proportion of genetic ancestries.

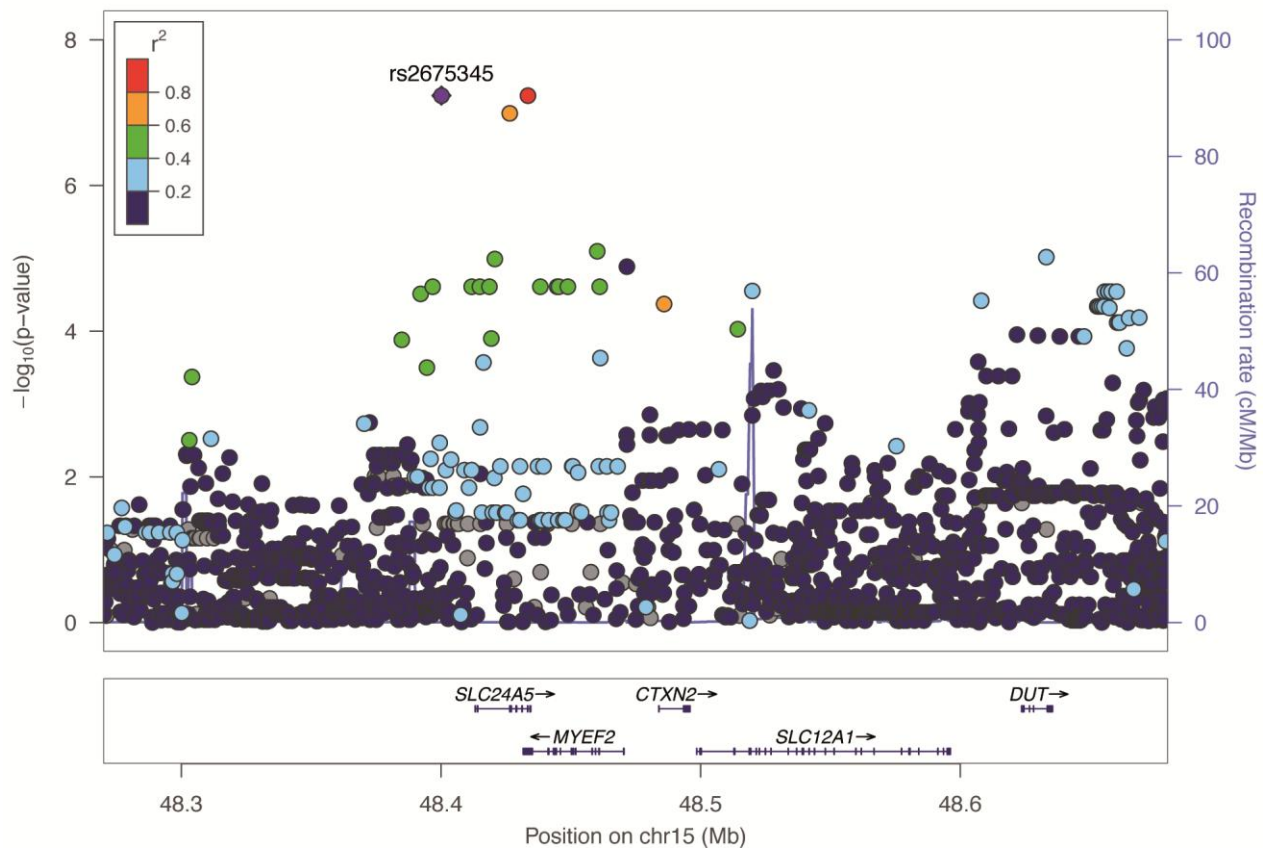

**Supplementary Figure S3. Regional plot of association results for *SLC24A5* and surrounding genes in the discovery stage.** The transformed probability of association ( $-\log_{10} p\text{-value}$ ) is represented for each SNP as a dot by chromosome position. Top hit (rs2675345) is represented with a diamond and the remaining SNPs are colour coded based on their LD with this SNP, indicated by pairwise  $r^2$  values for the Admixed American populations (AMR) from the 1,000 Genomes Project.

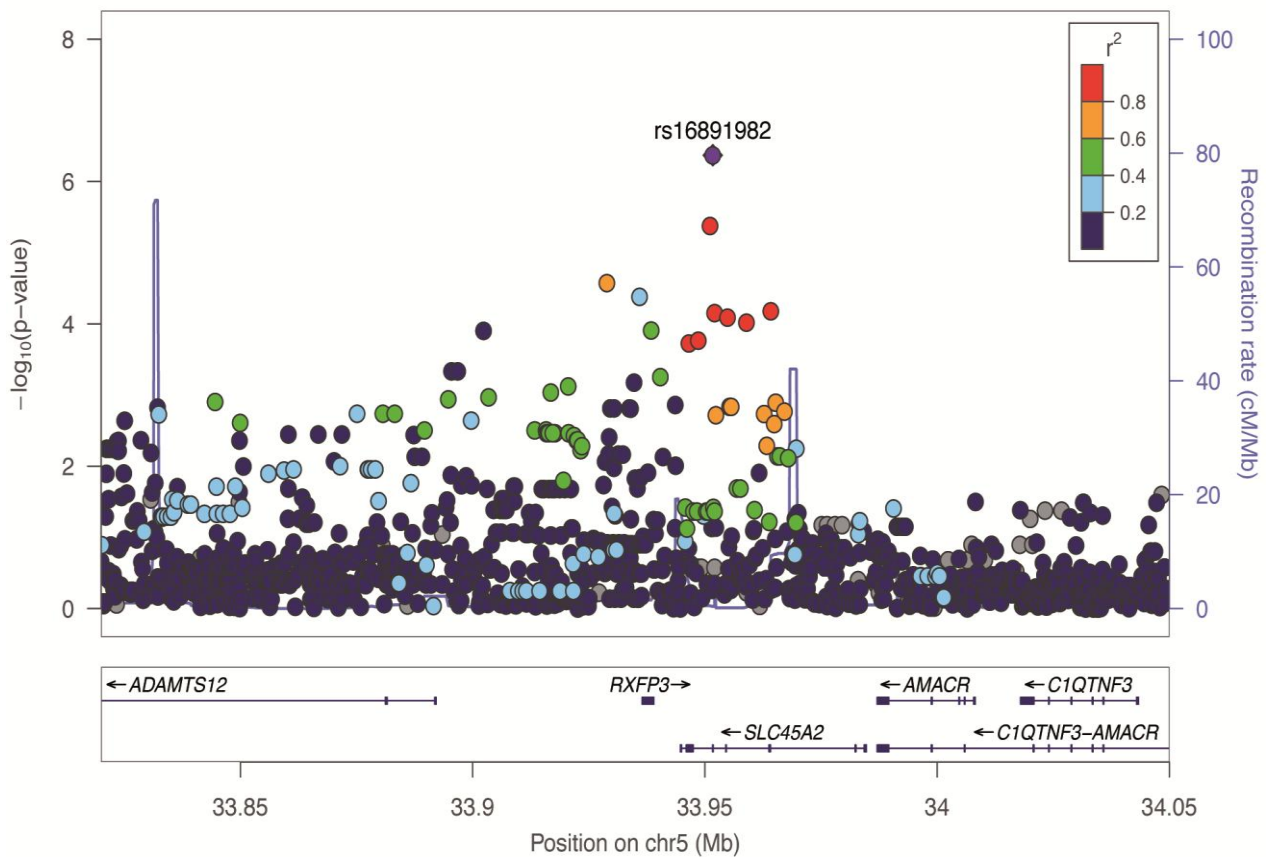

**Supplementary Figure S4. Regional plot of association results for *SLC45A2* in the discovery stage.** The transformed probability of association results ( $-\log_{10} p\text{-value}$ ) is represented for each SNP as a dot by chromosome position. The top hit (rs16891982) is depicted by a diamond, and the remaining SNPs are colour coded based on their LD with this SNP, indicated by pairwise  $r^2$  values for the AMR populations of the 1000 Genomes Project.

**Supplementary Table S1.** Summary of SNPs with  $p$ -values  $\leq 1 \times 10^{-5}$  for association with melanin index.

| SNP         | Chromosome band | Position  | A1/A2 | Freq.(A1) | $\beta$ (95% CI)       | $p$ -value            |
|-------------|-----------------|-----------|-------|-----------|------------------------|-----------------------|
| rs1432433   | 1q31.1          | 187918615 | G/A   | 0.023     | 8.02 (4.64 to 11.41)   | $5.24 \times 10^{-6}$ |
| rs77443641  | 1q31.1          | 188000243 | A/C   | 0.012     | 10.94 (6.42 to 15.46)  | $3.29 \times 10^{-6}$ |
| rs115105970 | 1q31.1          | 196942660 | T/C   | 0.03      | 6.84 (4.07 to 9.61)    | $2.20 \times 10^{-6}$ |
| rs112725747 | 1q32.1          | 204344757 | T/C   | 0.018     | 9.46 (5.68 to 13.25)   | $1.65 \times 10^{-6}$ |
| rs6659601   | 1p36.12         | 22124820  | G/A   | 0.872     | 1.69 (0.18 to 3.20)    | $2.58 \times 10^{-6}$ |
| rs76327975  | 1q44            | 244364879 | G/C   | 0.023     | 7.68 (4.35 to 11.01)   | $9.24 \times 10^{-6}$ |
| rs831984    | 2q12.3          | 108378250 | A/C   | 0.298     | 2.59 (1.46 to 3.72)    | $9.94 \times 10^{-6}$ |
| rs831980    | 2q12.3          | 108380107 | C/G   | 0.298     | 2.59 (1.46 to 3.72)    | $9.94 \times 10^{-6}$ |
| rs62170035  | 2q23.3          | 151111030 | A/C   | 0.033     | 6.28 (3.64 to 8.93)    | $5.07 \times 10^{-6}$ |
| rs55767876  | 2p14            | 66820715  | G/T   | 0.079     | 4.51 (2.6 to 6.42)     | $5.68 \times 10^{-6}$ |
| rs66871203  | 2p14            | 66821130  | G/T   | 0.079     | 4.51 (2.6 to 6.42)     | $5.68 \times 10^{-6}$ |
| rs79592764  | 3q27.3          | 187398936 | T/C   | 0.035     | 6.38 (3.74 to 9.02)    | $3.47 \times 10^{-6}$ |
| rs6788400   | 3p25.3          | 9886352   | G/A   | 0.089     | 3.86 (2.19 to 5.52)    | $8.89 \times 10^{-6}$ |
| rs28479566  | 4p15.33         | 14776694  | T/C   | 0.035     | -6.35 (-9.09 to -3.61) | $8.05 \times 10^{-6}$ |
| rs340417    | 5q35.3          | 178762064 | A/C   | 0.111     | -3.86 (-5.48 to -2.24) | $4.46 \times 10^{-6}$ |
| rs153816    | 5q35.3          | 178763605 | T/C   | 0.109     | -3.85 (-5.48 to -2.23) | $5.24 \times 10^{-6}$ |
| rs35397     | 5p13.2          | 33951116  | T/G   | 0.511     | -2.49 (-3.53 to -1.45) | $4.19 \times 10^{-6}$ |
| rs16891982  | 5p13.2          | 33951693  | G/C   | 0.523     | -2.66 (-3.67 to -1.65) | $4.27 \times 10^{-7}$ |
| rs77437330  | 6q21            | 111993747 | A/G   | 0.072     | 4.45 (2.52 to 6.38)    | $9.26 \times 10^{-6}$ |
| rs73753762  | 6q15            | 92184362  | G/A   | 0.014     | 10.3 (6.08 to 14.52)   | $2.76 \times 10^{-6}$ |
| rs77462788  | 7q31.32         | 122042978 | C/T   | 0.021     | 8.08 (4.63 to 11.54)   | $6.90 \times 10^{-6}$ |
| rs116908038 | 7q31.32         | 122168537 | C/A   | 0.021     | 8.08 (4.63 to 11.54)   | $6.90 \times 10^{-6}$ |
| rs7790204   | 7p14.2          | 36684481  | C/T   | 0.549     | -2.23 (-3.18 to -1.28) | $6.16 \times 10^{-6}$ |
| rs7794780   | 7p14.2          | 36685144  | C/T   | 0.542     | -2.34 (-3.29 to -1.39) | $2.28 \times 10^{-6}$ |
| rs12541402  | 8p22            | 15500967  | C/T   | 0.172     | -2.9 (-4.13 to -1.67)  | $5.93 \times 10^{-6}$ |
| rs6602665   | 10p13           | 13605982  | C/T   | 0.079     | 4.72 (2.89 to 6.54)    | $7.27 \times 10^{-7}$ |
| rs6602666   | 10p13           | 13606490  | G/A   | 0.079     | 4.72 (2.89 to 6.54)    | $7.27 \times 10^{-7}$ |
| rs151165649 | 10p12.1         | 25207241  | A/G   | 0.019     | 9.42 (5.84 to 13.00)   | $4.75 \times 10^{-7}$ |
| rs141664730 | 10p12.1         | 25338228  | C/G   | 0.016     | 9.83 (5.87 to 13.79)   | $1.91 \times 10^{-6}$ |

|             |          |           |     |       |                         |                       |
|-------------|----------|-----------|-----|-------|-------------------------|-----------------------|
| rs149207584 | 10p12.1  | 25339373  | C/T | 0.016 | 9.83 (5.87 to 13.79)    | 1.91x10 <sup>-6</sup> |
| rs111256285 | 10q11.22 | 47632167  | G/A | 0.016 | -8.43 (-12.08 to -4.79) | 8.61x10 <sup>-6</sup> |
| rs7477798   | 10q11.22 | 47632478  | C/A | 0.016 | -8.43 (-12.08 to -4.79) | 8.61x10 <sup>-6</sup> |
| rs115019323 | 11q21    | 95895552  | A/G | 0.025 | 7.12 (4.13 to 10.12)    | 4.85x10 <sup>-6</sup> |
| rs144848699 | 11q21    | 95895953  | C/T | 0.025 | 7.12 (4.13 to 10.12)    | 4.85x10 <sup>-6</sup> |
| rs1902910   | 12q12    | 41778982  | G/A | 0.104 | 3.88 (2.3 to 5.46)      | 2.45x10 <sup>-6</sup> |
| rs17129378  | 12q12    | 41861386  | C/T | 0.104 | 3.99 (2.35 to 5.63)     | 3.05x10 <sup>-6</sup> |
| rs17578886  | 12q12    | 41862536  | G/A | 0.084 | 4.33 (2.57 to 6.09)     | 2.40x10 <sup>-6</sup> |
| rs10849455  | 12p13.33 | 785468    | G/T | 0.811 | 2.94 (1.68 to 4.21)     | 7.29x10 <sup>-6</sup> |
| rs138891280 | 13q33.2  | 106722485 | G/A | 0.021 | 8.06 (4.59 to 11.52)    | 7.85x10 <sup>-6</sup> |
| rs188019015 | 13q33.2  | 106743244 | T/C | 0.016 | 9.33 (5.35 to 13.31)    | 6.51x10 <sup>-6</sup> |
| rs146078872 | 13q33.2  | 106745894 | G/A | 0.016 | 9.33 (5.35 to 13.31)    | 6.51x10 <sup>-6</sup> |
| rs114396339 | 13q33.2  | 106746964 | T/A | 0.016 | 9.33 (5.35 to 13.31)    | 6.51x10 <sup>-6</sup> |
| rs727752    | 13q33.2  | 106754594 | A/C | 0.016 | 9.33 (5.35 to 13.31)    | 6.51x10 <sup>-6</sup> |
| rs2016565   | 13q33.2  | 106754788 | C/T | 0.016 | 9.33 (5.35 to 13.31)    | 6.51x10 <sup>-6</sup> |
| rs115940594 | 13q33.2  | 106754945 | T/C | 0.016 | 9.33 (5.35 to 13.31)    | 6.51x10 <sup>-6</sup> |
| rs3024737   | 13q34    | 113819785 | G/A | 0.012 | 11.26 (6.79 to 15.73)   | 1.37x10 <sup>-6</sup> |
| rs7326155   | 13q34    | 114460362 | C/T | 0.014 | 9.78 (5.58 to 13.99)    | 7.59x10 <sup>-6</sup> |
| rs10133804  | 14q32.12 | 92866905  | C/T | 0.011 | 1.44 (-3.58 to 6.45)    | 1.81x10 <sup>-6</sup> |
| rs11858919  | 15q12    | 26599133  | T/C | 0.025 | 7.59 (4.35 to 10.83)    | 6.48x10 <sup>-6</sup> |
| rs2675345   | 15q21.1  | 48400199  | G/A | 0.277 | 3.31 (2.14 to 4.47)     | 5.83x10 <sup>-6</sup> |
| rs1426654   | 15q21.1  | 48426484  | G/A | 0.312 | 3.06 (1.96 to 4.16)     | 1.02x10 <sup>-7</sup> |
| rs2470102   | 15q21.1  | 48433494  | G/A | 0.277 | 3.31 (2.14 to 4.47)     | 5.83x10 <sup>-8</sup> |
| rs8028919   | 15q21.1  | 48460188  | A/G | 0.793 | -2.95 (-4.22 to -1.68)  | 7.99x10 <sup>-6</sup> |
| rs11637235  | 15q21.1  | 48633153  | T/C | 0.509 | -2.26 (-3.24 to -1.28)  | 9.61x10 <sup>-6</sup> |
| rs2899446   | 15q21.2  | 50307416  | G/A | 0.544 | 2.28 (1.34 to 3.21)     | 2.73x10 <sup>-6</sup> |
| rs8033655   | 15q21.2  | 50308950  | G/A | 0.544 | 2.28 (1.34 to 3.21)     | 2.73x10 <sup>-6</sup> |
| rs7180182   | 15q21.2  | 50310295  | G/A | 0.544 | 2.28 (1.34 to 3.21)     | 2.73x10 <sup>-6</sup> |
| rs4580097   | 15q21.2  | 50315253  | A/G | 0.544 | 2.28 (1.34 to 3.21)     | 2.73x10 <sup>-6</sup> |
| rs28753701  | 15q22.1  | 59175467  | T/C | 0.963 | -6.16 (-8.83 to -3.49)  | 9.23x10 <sup>-6</sup> |
| rs77045588  | 15q22.2  | 61136327  | A/C | 0.012 | 10.52 (6.01 to 15.02)   | 7.23x10 <sup>-6</sup> |
| rs78604138  | 15q22.2  | 61144845  | G/A | 0.012 | 10.52 (6.01 to 15.02)   | 7.23x10 <sup>-6</sup> |

|             |          |          |     |       |                        |                       |
|-------------|----------|----------|-----|-------|------------------------|-----------------------|
| rs79617268  | 15q22.2  | 61145173 | G/C | 0.012 | 10.52 (6.01 to 15.02)  | 7.23x10 <sup>-6</sup> |
| rs532282237 | 15q22.2  | 61817211 | C/T | 0.011 | 12.51 (7.7 to 17.31)   | 6.14x10 <sup>-7</sup> |
| rs61310892  | 15q22.31 | 66319806 | A/G | 0.014 | 10.02 (5.8 to 14.25)   | 5.04x10 <sup>-6</sup> |
| rs7200304   | 16p13.12 | 13844197 | C/T | 0.916 | 4.2 (2.37 to 6.03)     | 9.99x10 <sup>-6</sup> |
| rs7193564   | 16p13.12 | 13844299 | A/G | 0.916 | 4.2 (2.37 to 6.03)     | 9.99x10 <sup>-6</sup> |
| rs7200773   | 16p13.12 | 13845690 | A/G | 0.916 | 4.2 (2.37 to 6.03)     | 9.99x10 <sup>-6</sup> |
| rs4141382   | 16p13.12 | 13845726 | A/T | 0.916 | 4.2 (2.37 to 6.03)     | 9.99x10 <sup>-6</sup> |
| rs7185574   | 16p13.12 | 13846274 | T/A | 0.916 | 4.2 (2.37 to 6.03)     | 9.99x10 <sup>-6</sup> |
| rs9926165   | 16p12.1  | 26958800 | T/C | 0.602 | 2.32 (1.32 to 3.32)    | 8.62x10 <sup>-6</sup> |
| rs9926268   | 16p12.1  | 26958967 | T/C | 0.600 | 2.32 (1.32 to 3.33)    | 8.48x10 <sup>-6</sup> |
| rs62029775  | 16p12.1  | 26959698 | T/C | 0.609 | 2.48 (1.48 to 3.48)    | 1.99x10 <sup>-6</sup> |
| rs117307642 | 17q12    | 33823098 | T/C | 0.042 | 6.42 (3.93 to 8.91)    | 7.94x10 <sup>-7</sup> |
| rs62143248  | 19q13.42 | 54364168 | T/C | 0.079 | -4.72 (-6.63 to -2.81) | 2.04x10 <sup>-6</sup> |
| rs62143250  | 19q13.42 | 54365667 | A/G | 0.079 | -4.72 (-6.63 to -2.81) | 2.04x10 <sup>-6</sup> |
| rs8102993   | 19q13.42 | 54366811 | T/C | 0.079 | -4.68 (-6.59 to -2.78) | 2.35x10 <sup>-6</sup> |
| rs11882947  | 19q13.42 | 54368893 | A/G | 0.074 | -4.77 (-6.73 to -2.81) | 3.00x10 <sup>-6</sup> |
| rs16985221  | 19q13.42 | 54374041 | T/C | 0.1   | -3.92 (-5.6 to -2.24)  | 6.98x10 <sup>-6</sup> |
| rs62143251  | 19q13.42 | 54374699 | A/G | 0.096 | -4.14 (-5.83 to -2.45) | 2.55x10 <sup>-6</sup> |
| rs6142102   | 20q11.22 | 32704627 | G/C | 0.616 | 2.24 (1.28 to 3.2)     | 7.28x10 <sup>-6</sup> |
| rs755107    | 20q11.23 | 36662831 | G/A | 0.039 | -5.5 (-7.88 to -3.11)  | 9.36x10 <sup>-6</sup> |
| rs201429679 | 22q12.2  | 31113081 | T/G | 0.032 | 6.91 (4.04 to 9.79)    | 3.92x10 <sup>-6</sup> |



**Supplementary Table S2.** Results of the regression models in Hispanics/Latinos from Puerto Rico conditioned on the top hit of each chromosome region with genome-wide significant signals in the meta-analysis.

| <b>Genomic region</b>              | <b>SNP</b> | <b>Regression conditioned on</b> | <b>Original <i>p</i>-value of the SNP</b> | <b><i>p</i>-value conditional regression</b> |
|------------------------------------|------------|----------------------------------|-------------------------------------------|----------------------------------------------|
|                                    | rs1426654  |                                  | 1.02x10 <sup>-7</sup>                     | 0.463                                        |
| <i>SLC24A5, MYEF2, DUT, ATP8B4</i> | rs2470102  | rs2675345                        | 5.83x10 <sup>-8</sup>                     | NA <sup>a</sup>                              |
|                                    | rs8028919  |                                  | 7.99x10 <sup>-6</sup>                     | 0.826                                        |
|                                    | rs11637235 |                                  | 9.61x10 <sup>-6</sup>                     | 0.112                                        |
|                                    |            |                                  |                                           |                                              |
| <i>SLC45A2</i>                     | rs35397    | rs16891982                       | 4.19x10 <sup>-6</sup>                     | 0.945                                        |
| <i>BEND7-PRPF18</i>                | rs6602666  | rs6602665                        | 7.27x10 <sup>-7</sup>                     | 0.788                                        |

<sup>a</sup>The regression was not applicable due to the existence of co-linearity among rs2470102 and rs2675345 and high LD ( $R^2=1$ ).
